# Supplementary material
Source: PubMed Central journal article supplement (PMC8224829)

**Supporting information**

**for**

**Engineering Biorthogonal Phage-based Nanobots for Ultrasensitive, *in situ* Bacteria  
Detection**

Hannah S. Zurier, Michelle M. Duong, Julie M. Goddard, and Sam R. Nugen\*

\*srn6@cornell.edu

Number of pages: 6

Tables: 9

Figures: 2

**Table S1: Bacteria and Phages used in this study**

| Strain                                      | Strain source                                                             |
|---------------------------------------------|---------------------------------------------------------------------------|
| <i>Escherichia coli</i> strain DH5 $\alpha$ | Invitrogen                                                                |
| <i>Escherichia coli</i> strain BL21 (DE3)   | Invitrogen                                                                |
| <i>Escherichia coli</i> strain 10G          | Lucigen                                                                   |
| <i>Escherichia coli</i> strain ECOR#13      | University of Texas, Austin, TX, USA (human isolate)                      |
| <i>Listeria monocytogenes</i>               | FSL C7-0239 (environmental water isolate)                                 |
| <i>Pseudomonas aeruginosa</i>               | ATCC 27853                                                                |
| <i>Spingopyxis alaskiensis</i>              | NRG-0228 (tap water isolate)                                              |
| <i>E. coli</i> phage T4                     | ATCC 11303-B4                                                             |
| NRGp17                                      | <i>E. coli</i> phage T4 Nluc-CBM (Duong <i>et al.</i> 2020) <sup>32</sup> |
| <i>E. coli</i> phage RB69                   | Paul Sabatier University, Toulouse, FR                                    |
| <i>E. coli</i> phage T7                     | ATCC BAA-1025-B2                                                          |

**Table S2: Primers used in this study**

| Template | Purpose                                                   | Direction | Sequence (5' to 3')                                    |
|----------|-----------------------------------------------------------|-----------|--------------------------------------------------------|
| pET 11a  | Adds SOC homology and 6X His tag                          | Forward   | agtaagtggatcaccatcaccatcactaag<br>atccggctgtaacaaag    |
| pET 11a  | Adds SOC homology and amber codon                         | Reverse   | cataaccacctacatgtatatctcctcttaa<br>agttaaacaaaattatttc |
| RB69     | Amplifies SOC gene, adds pET 11a homology and amber codon | Forward   | acatatgtaggggtggtatgtaaacatcaaaac                      |
| RB69     | Amplifies SOC gene, adds pET 11a homology and 6X His tag  | Reverse   | ttagtgatggatggtgatgaccactactggt<br>gtagg               |
| pET 11a  | Adds SOC homology                                         | Reverse   | taaccacccatgtatatctcctcttaaagtta<br>aacaaaattatttc     |
| RB69     | Amplifies SOC gene, adds pET 11a homology                 | Forward   | gatatacatatgggtggtatgtaaacatc                          |

**Table S3: Raw fluorescent cycloaddition data.** Data are displayed in Figure 3a.

| Replicate | Fluorescence (RFU) by sample type |        |          |             |
|-----------|-----------------------------------|--------|----------|-------------|
|           | Click SOC                         | WT SOC | Free Prp | Buffer only |
| 1         | 602                               | 328    | 867      | 326         |
| 2         | 642                               | 359    | 481      | 341         |
| 3         | 723                               | 281    | 828      | 298         |
| 4         | 628                               | 348    | 781      | 255         |

**Table S4: Raw bead infectivity data.** Data are displayed in Figures 4a and 4b.

| Wash        | Replicate | Plate count (pfu/ml) by SOC protein used |          |          |
|-------------|-----------|------------------------------------------|----------|----------|
|             |           | Click SOC                                | No SOC   | WT SOC   |
| supernatant | 1         | 2.80E+07                                 | 1.60E+07 | 1.00E+08 |
| supernatant | 2         | 2.00E+07                                 | 1.50E+07 | 8.00E+07 |

|                   |   |          |          |          |
|-------------------|---|----------|----------|----------|
| supernatant       | 3 | 3.50E+07 | 8.00E+06 | 9.00E+07 |
| wash 1            | 1 | 5.00E+05 | 2.00E+05 | 1.00E+06 |
| wash 1            | 2 | 2.00E+05 | 2.00E+05 | 4.00E+06 |
| wash 1            | 3 | 7.00E+05 | 3.00E+05 | 3.00E+06 |
| wash 2            | 1 | 9.00E+04 | 7.00E+04 | 8.00E+05 |
| wash 2            | 2 | 4.00E+04 | 5.00E+04 | 5.00E+05 |
| wash 2            | 3 | 5.00E+04 | 5.00E+04 | 7.00E+05 |
| wash 3            | 1 | 3.00E+03 | 3.00E+03 | 2.00E+04 |
| wash 3            | 2 | 2.00E+03 | 5.00E+03 | 2.00E+04 |
| wash 3            | 3 | 3.00E+03 | 4.00E+03 | 2.00E+04 |
| Resuspended beads | 1 | 2.00E+05 | 1.00E+03 | 9.00E+03 |
| Resuspended beads | 2 | 1.00E+05 | 1.00E+03 | 1.40E+04 |
| Resuspended beads | 3 | 1.00E+05 | 1.00E+03 | 8.00E+03 |

**Table S5: Raw reagent sensitivity luminescent data.** Data are displayed in Figure 5a.

| <i>E. coli</i> concentration         | Replicate | Luminescence (RLU) by detection reagent |             |                    |                       |
|--------------------------------------|-----------|-----------------------------------------|-------------|--------------------|-----------------------|
|                                      |           | MNPs                                    | Free NRGp17 | WT SOC NRGp17 MNPs | Click SOC NRGp17 MNPs |
| 3.64 ± 0.32 log <sub>10</sub> cfu/ml | 1         | 6                                       | 40          | 34                 | 304                   |
| 3.64 ± 0.32 log <sub>10</sub> cfu/ml | 2         | 1                                       | 152         | 70                 | 198                   |
| 3.64 ± 0.32 log <sub>10</sub> cfu/ml | 3         | 5                                       | 86          | 89                 | 132                   |
| 3.64 ± 0.32 log <sub>10</sub> cfu/ml | 4         | 2                                       | 19          | 106                | 58                    |
| 0 cfu/ml                             | 1         | 11                                      | 21          | 25                 | 18                    |
| 0 cfu/ml                             | 2         | 2                                       | 21          | 25                 | 24                    |
| 0 cfu/ml                             | 3         | 1                                       | 16          | 25                 | 13                    |
| 0 cfu/ml                             | 4         | 0                                       | 20          | 21                 | 15                    |

**Table S6: Raw reagent specificity data.** Data are displayed in Figure 5b.

| Replicate | Luminescence (RLU) by organism detected |                     |               |                |
|-----------|-----------------------------------------|---------------------|---------------|----------------|
|           | ECOR#13 with non-coliforms              | Non-coliforms alone | ECOR#13 alone | Buffer control |
| 1         | 837                                     | 24                  | 765           | 17             |
| 2         | 733                                     | 20                  | 1222          | 17             |
| 3         | 550                                     | 13                  | 1342          | 20             |
| 4         | 777                                     | 19                  | 1270          | 23             |

**Table S7: Raw large-scale detection data.** Bacteria concentration is reported as the mean ± standard deviation of 12 plate counts. Data are displayed in Figures 6a and 6b.

| Bacteria concentration (cfu/100 mL) | Replicate | Luminescence (RLU) |
|-------------------------------------|-----------|--------------------|
| 132 ± 33.6                          | 1         | 54                 |

|             |   |    |
|-------------|---|----|
| 132 ± 33.6  | 2 | 50 |
| 132 ± 33.6  | 3 | 69 |
| 6.58 ± 1.68 | 3 | 29 |
| 6.58 ± 1.68 | 1 | 26 |
| 6.58 ± 1.68 | 2 | 32 |
| 0           | 1 | 11 |
| 0           | 2 | 5  |
| 0           | 3 | 5  |

**Table S8: Raw large-scale biological replicated data.** Bacteria concentration is reported as the mean ± standard deviation of 12 plate counts.

| Biological replicate | Bacteria concentration (cfu/100 mL) | Luminescence (RLU) |
|----------------------|-------------------------------------|--------------------|
| 1                    | 79.4 ± 9.8                          | 38                 |
| 1                    | 3.97 ± 0.49                         | 35                 |
| 1                    | 0                                   | 27                 |
| 2                    | 81.6 ± 31                           | 130                |
| 2                    | 4.08 ± 1.55                         | 25                 |
| 2                    | 0                                   | 8                  |
| 3                    | 71.7 ± 27.6                         | 54                 |
| 3                    | 3.58 ± 1.38                         | 32                 |
| 3                    | 0                                   | 11                 |

**Table S9:** MNP size distribution. Data were obtained by dynamic light scattering and sizes are reported as mode ± standard deviation

| Peak | % mass in peak | Hydrodynamic radius (nm) | Molecular weight (kDa) | Polydispersity (%) |
|------|----------------|--------------------------|------------------------|--------------------|
| 1    | 99.8           | 8.721 ± 1.472            | 105.6 ± 22.9           | 16.7               |
| 2    | 0.1            | 105.7 ± 16.72            | 3.62E+04 ± 5.43E+03    | 16.6               |
| 3    | 0.2            | 396.1 ± 87.76            | 7.96E+05 ± 1.46E+05    | 21.2               |

### Figure S1. Click SOC construct design

**a** Schematic of dual plasmid system used for amber suppression. Arrows indicate promoters, star indicates amber codon. RB69 SOC gene is shown in pink, Prp tRNA synthetase gene is shown in green.

**b** Structure of propargylglyoxy phenylalanine (Prp)

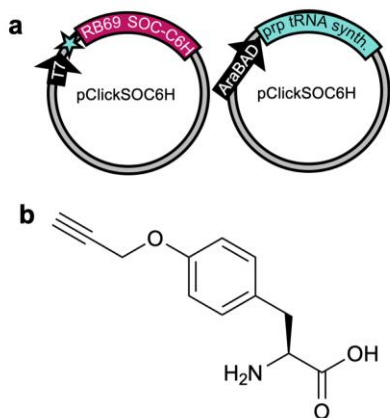

**Figure S2. Click SOC and WT SOC purification**

Total indicates whole cell lysate. Load indicates clarified lysate. Resin was washed with 25 mM imidazole and protein was eluted with 150 mM imidazole. Numbers indicate approximate molecular weight of bands on ladder.

**a** SDS-PAGE of Click SOC purification.

**b** Western blot of Click SOC purification

**c** SDS-PAGE of WT SOC purification

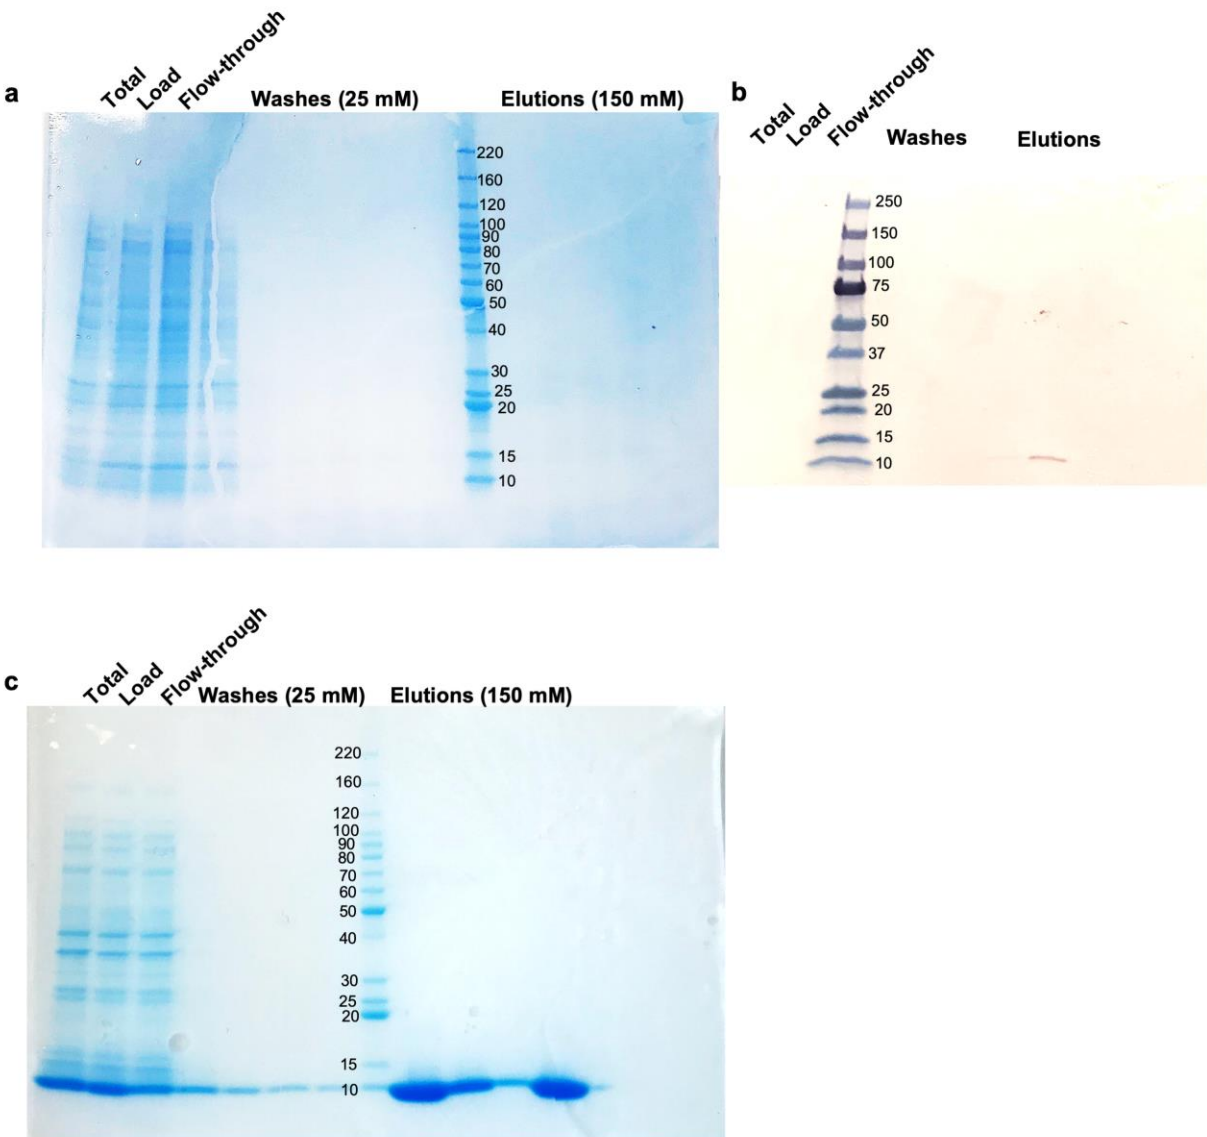

Supplement: NIHMS1629615-supplement-Supp_Material.pdf [file NIHMS1629615-supplement-Supp_Material.pdf]
